# Supplementary material for: Integrative Data Augmentation with U-Net Segmentation Masks Improves Detection of Lymph Node Metastases in Breast Cancer Patients
Source: PubMed Central journal article supplement (PMC7601653; doi:10.3390/cancers12102934), 2020-10-12
Supplement: cancers-12-02934-s001.pdf [file cancers-12-02934-s001.pdf]

# Supplementary Material: Integrative Data Augmentation with U-net Segmentation Masks Improves Detection of Lymph Node Metastases in Breast Cancer Patients

Yong Won Jin, Shuo Jia, Ahmed Bilal Ashraf and Pingzhao Hu

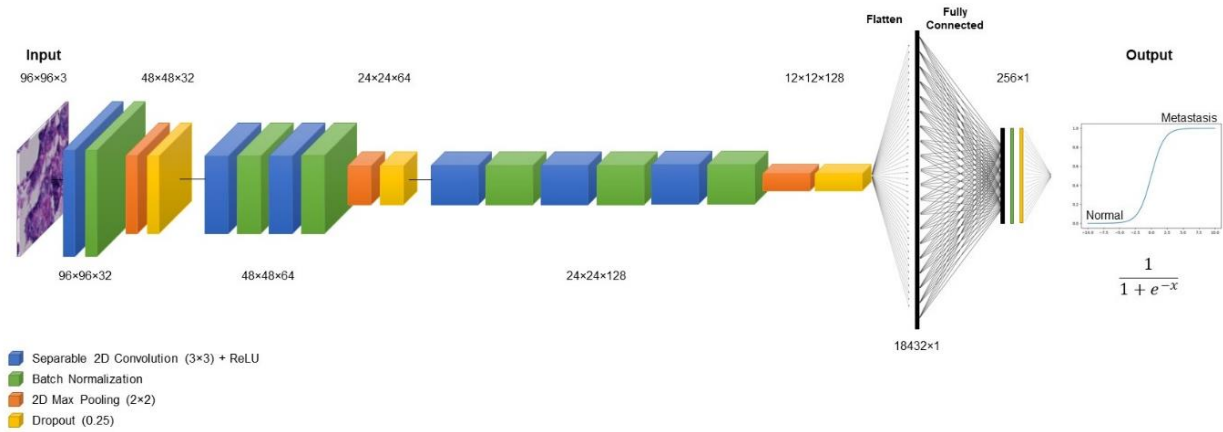

**Figure S1.** Architecture of the baseline model used in this study. It resembles the VGG16 network but instead of traditional convolutional filters, it takes advantage of depth-wise convolutional filter layers for reduced number of parameters. We further modified the input layer as well as filter dimensions in the last few layers to accommodate the architecture to our problem.

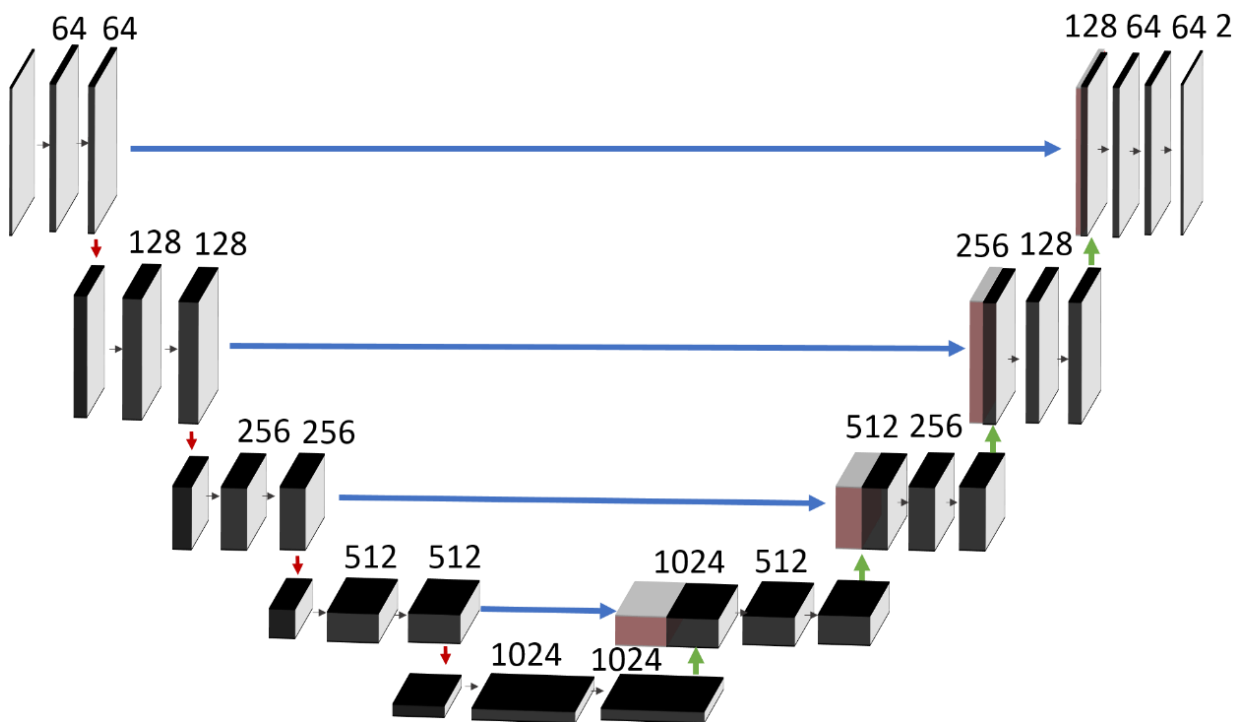

**Figure S2.** U-net structure for image segmentation. We applied U-net on histology images to extract multiple perspectives containing different histological features. U-net can be trained efficiently for image segmentation tasks even with few training images. Black boxes are  $3 \times 3$  convolutional layers with ReLU, while blue arrows are copy and concatenate procedures, red arrows are  $2 \times 2$  max pooling layers and green arrows are  $2 \times 2$  up-convolutional layers.

A

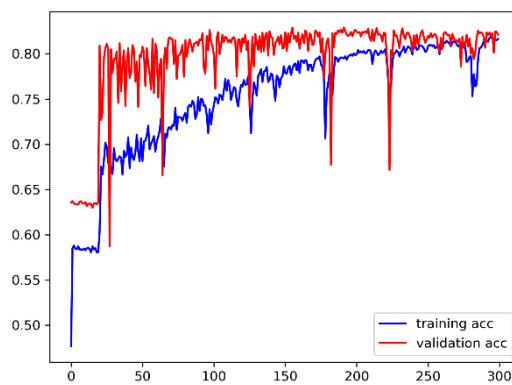

B

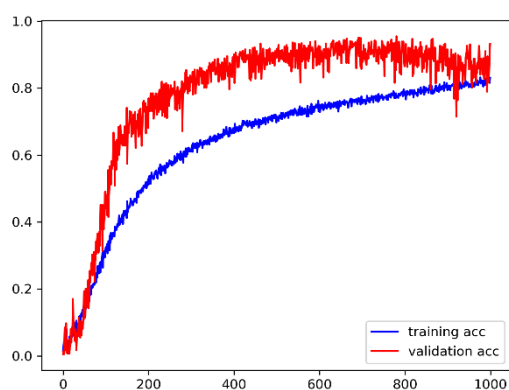

C

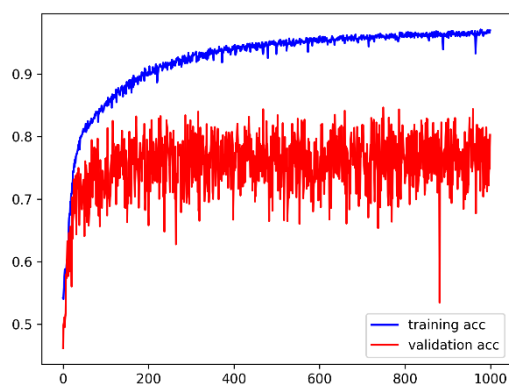

**Figure S3.** Record of training and validation accuracies across epochs for U-nets trained for semantic segmentation of (A) epithelium; (B) mitosis; and (C) tubule. Metrics were not explicitly recorded for nucleus U-net and was therefore, omitted.

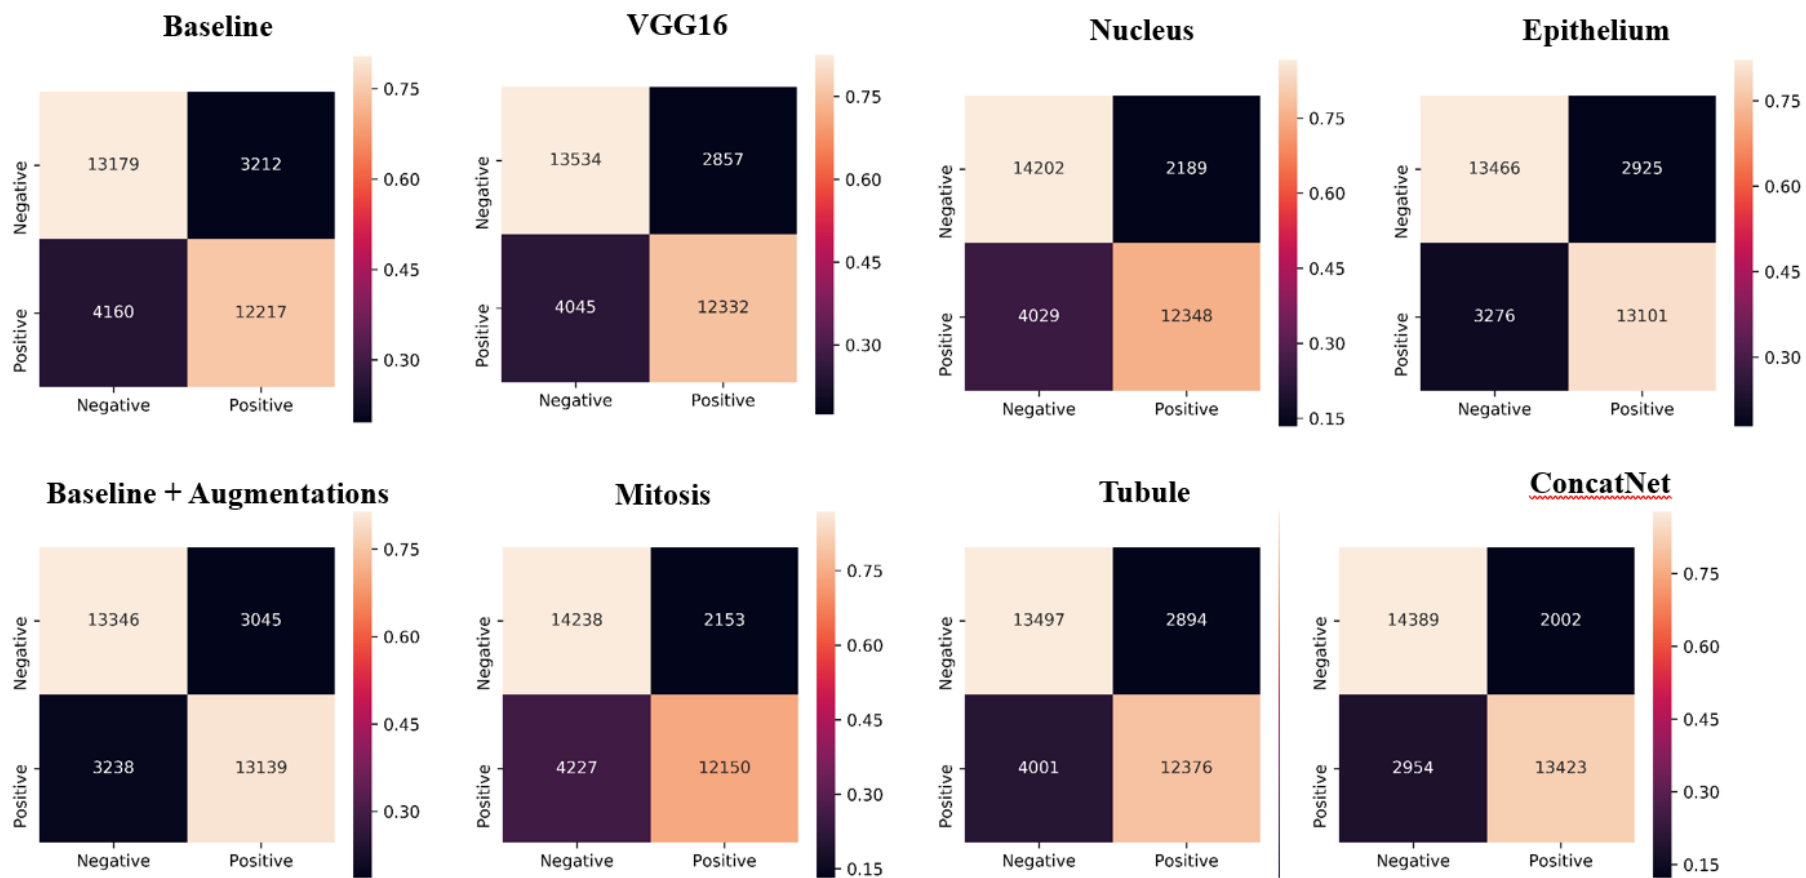

**Figure S4.** Confusion matrices for models evaluated on the test set. Y-axis represents actual labels (lymph node positive vs. negative), and X-axis represents predicted labels. As the scales indicate, lighter color indicates rate closer to 1 and darker color indicates rate closer to 0.

Table S1. Model hyperparameters.

| Model              | Number of parameters (trainable) | Epoch | Train Steps | Valid Steps | Batch Size | Loss Function                 | Optimizer | Learn Rate         |
|--------------------|----------------------------------|-------|-------------|-------------|------------|-------------------------------|-----------|--------------------|
| U-net (Nucleus)    | 31,032,837                       | 50    | 90          | 10          | 1          | Binary cross-entropy          | NAdam     | $1 \times 10^{-5}$ |
| U-net (Mitosis)    | 31,032,837                       | 1000  | 252         | 27          | 1          | Weighted binary cross-entropy | NAdam     | $1 \times 10^{-5}$ |
| U-net (Epithelium) | 31,032,837                       | 300   | 38          | 4           | 1          | Binary cross-entropy          | NAdam     | $1 \times 10^{-5}$ |
| U-net (Tubule)     | 31,032,837                       | 1000  | 77          | 8           | 1          | Binary cross-entropy          | NAdam     | $1 \times 10^{-5}$ |
| Baseline           | 4,772,220                        | 50    | 8192        | 1024        | 32         | Binary cross-entropy          | Adam      | $1 \times 10^{-4}$ |
| VGG16              | 35,663,873                       | 50    | 8192        | 1024        | 32         | Binary cross-entropy          | Adam      | $1 \times 10^{-4}$ |
| U-net + Baseline   | 4,772,261                        | 50    | 8192        | 1024        | 32         | Binary cross-entropy          | Adam      | $1 \times 10^{-4}$ |
| ConcatNet          | 4,772,384                        | 50    | 8192        | 1024        | 32         | Binary cross-entropy          | Adam      | $1 \times 10^{-4}$ |
